# Supplementary material
Source: publisher site journal article supplement (https://www.dovepress.com/get_supplementary_file.php?f=253252.docx)
Supplement: Supplementary file 1 [file get_supplementary_file.php]

**Supplementary table 1** TreatmentCosts by CKD stage and comorbidity

|  | **Total**  **treatment cost** | **Cost expenditure in** | | | | |
| --- | --- | --- | --- | --- | --- | --- |
| **Drug** | **Laboratory test** | **Imaging** | **Service** | **Physical therapy** |
| All patients (n=212) | 5701.34 ± 5490.35 | 1696.14 ± 1965.33 | 1957.91 ± 1161.87 | 78.67 ± 217.60 | 2328.54 ± 3825.93 | 203.51 ± 328.57 |
| CKD stage |  |  |  |  |  |  |
| G3a (n= 123) | 4913.59 ± 4266.90 | 1250.98 ± 1190.24 | 1846.88 ± 829.45 | 62.73 ± 189.73 | 2233.49 ± 4080.54 | 212.50 ± 409.28 |
| G3b (n= 67) | 5474.06 ± 5230.63 | 1843.72 ± 2164.39 | 1906.23 ± 1337.47 | 89.19 ± 238.43 | 1894.48 ± 2495.63 | 200.45 ± 176.88 |
| G4 (n= 22) | 10797.73 ± 8950.33 | 3735.51 ± 3204.51 | 2736.16 ± 1797.16 | 135.81 ± 287.58 | 4181.93 ± 5149.16 | 162.54 ± 104.70 |
| Hypertension  (n=199) | 5790.64 ± 5587.17 | 1753.12 ± 1997.06 | 1950.37 ± 1157.51 | 79.31 ± 220.25 | 2374.26 ± 3925.84 | 208.57 ± 337.52 |
| Diabetes mellitus (n=74) | 8416.24 ± 7564.27 | 2920.47 ± 2662.53 | 2618.17 ± 1548.24 | 77.68 ± 208.71 | 3335.48 ± 5662.93 | 215.43 ± 157.53 |
| Dyslipidemia  (n=105) | 5916.48 ± 5368.77 | 1668.01 ± 2287.36 | 1985.20 ± 1218.51 | 68.29 ± 212.31 | 2149.74 ± 3322.36 | 218.90 ± 384.05 |
| Obesity  (n=29) | 7314.23 ± 7096.56 | 2470.69 ± 2968.06 | 2439.52 ± 1828.29 | 154.54 ± 335.20 | 2533.68 ± 3470.75 | 203.32 ± 225.52 |

Mean ± standard deviation (% contribution in treatment costs), costs were presented in Thai Baht

**Supplementary table 2** Cost model of chronic kidney disease treatment stratified by stages

|  | **Unstandardized Coefficients** | | | | **95 % Confidence Interval for B** | |
| --- | --- | --- | --- | --- | --- | --- |
|  | **B** | **SE** | **t** | **Sig.** | **Lower Bound** | **Upper Bound** |
| **CKD G3a**; adjusted R2 =0.918 | | | | |  |  |
| Constant | -1605.128 | 863.539 | -1.859 | .066 | -3315.322 | 105.066 |
| Length of stay | 1932.805 | 71.095 | 27.186 | .000 | 1792.006 | 2073.604 |
| Ambulatory visit | 398.319 | 44.676 | 8.916 | .000 | 309.840 | 486.798 |
| Diabetes mellitus | 1547.442 | 255.476 | 6.057 | .000 | 1041.485 | 2053.398 |
| Dyslipidemia | 648.712 | 232.201 | 2.794 | .006 | 188.850 | 1108.574 |
| Serum creatinine | 1690.009 | 664.813 | 2.542 | .012 | 373.381 | 3006.637 |
|  |  |  |  |  |  |  |
| **CKD G3b**; adjusted R2 = 0.892 | | | | |  |  |
| Constant | -9021.264 | 1876.189 | -4.808 | .000 | -12771.713 | -5270.815 |
| Length of stay | 2560.104 | 157.552 | 16.249 | .000 | 2245.162 | 2875.047 |
| Ambulatory visit | 770.750 | 106.704 | 7.223 | .000 | 557.451 | 984.049 |
| Fasting blood glucose | 29.137 | 5.108 | 5.705 | .000 | 18.927 | 39.347 |
| Serum creatinine | 3606.199 | 1046.082 | 3.447 | .001 | 1515.112 | 5697.287 |
|  |  |  |  |  |  |  |
| **CKD G4**; adjusted R2 = 0.929 | | | | |  |  |
| Constant | 1139.214 | 1242.450 | .917 | .371 | -1471.076 | 3749.504 |
| Length of stay | 2455.553 | 154.447 | 15.899 | .000 | 2131.072 | 2780.033 |
| Diabetes mellitus | 4280.914 | 1089.370 | 3.930 | .001 | 1992.233 | 6569.595 |
| Dyslipidemia | 2668.305 | 1089.761 | 2.449 | .025 | 378.803 | 4957.807 |

SE, standard error; Sig., significance
